# Supplementary material for: Prevalence of Intestinal Parasitic Infections, Genotypes, and Drug Susceptibility of Giardia lamblia among Preschool and School-Aged Children: A Cross-Sectional Study in Thailand
Source: MDPI journal article supplement (doi:10.3390/tropicalmed8080394), 2023-08-01

**Table S1:** Probes and primers used for the screening and genotyping of Giardia from stool samples

|                  | Target gene | Sequence                       | Reference<br>(GenBank Accession No.)                      |
|------------------|-------------|--------------------------------|-----------------------------------------------------------|
| Probe: GD-P      | SSU<br>rRNA | VIC-CCCGCGGCGGTCCCTGCTAG-MGB   | M54878<br>Liu et al., 2013<br>Llewellyn S., et al. (2016) |
| Primer: GD-F     |             | GACGGCTCAGGACAACGGTT           |                                                           |
| Primer: GD-P     |             | TTGCCAGCGGTGTCCG               |                                                           |
| Probe: GiardA-P  | TPI A       | FAM-CGCTGCTATCCTCAACTG-MGB     | XM_001706778 Modified<br>(Almeida et al., 2010)           |
| Primer: GiardA-F |             | CGTACACCTGTCAACAGCCATT         |                                                           |
| Primer: GiardA-R |             | CCTGAAGCATCTCAACACTTGTCT       |                                                           |
| Probe: GiardB-P  | TPI B       | VIC-ATTCTCCAATCTCCTTCTTAAG-MGB | KP687784<br>Modified (Almeida et al., 2010)               |
| Primer: GiardB-F |             | GATGAACGCAAGGCCAATAA           |                                                           |
| Primer: GiardB-R |             | GGCAATTACAACGTTCTCCATA         |                                                           |

**Table S2:** Frequency of symptoms in study participants

| Symptoms & Signs       | <i>Giardia lamblia</i> infection (N=115) | Non- <i>Giardia lamblia</i> infection (N=546) | P-value | Pathogenic (N=131) | Non-pathogenic (N=530) | P-value |
|------------------------|------------------------------------------|-----------------------------------------------|---------|--------------------|------------------------|---------|
| Abdominal cramping (%) |                                          |                                               |         |                    |                        |         |
| - Having               | 12 (10.43)                               | 52 (9.52)                                     | 0.764   | 13 (9.92)          | 51 (9.62)              | 0.917   |
| - Not having           | 103 (89.57)                              | 494 (90.48)                                   |         | 118 (90.08)        | 479 (90.38)            |         |
| Nausea                 |                                          |                                               |         |                    |                        |         |
| - Having               | 2 (1.74)                                 | 8 (1.47)                                      | 0.827   | 2 (1.53)           | 8 (1.51)               | 0.988   |
| - Not having           | 113 (98.26)                              | 538 (98.53)                                   |         | 129 (98.47)        | 522 (98.49)            |         |
| Vomiting               |                                          |                                               |         |                    |                        |         |
| - Having               | 7 (6.09)                                 | 23 (4.21)                                     | 0.380   | 7 (5.34)           | 23 (4.34)              | 0.621   |
| - Not having           | 108 (93.91)                              | 523 (95.79)                                   |         | 124 (94.66)        | 507 (95.66)            |         |
| Diarrhea               |                                          |                                               |         |                    |                        |         |
| - Having               | 5 (4.35)                                 | 22 (4.03)                                     | 0.875   | 6 (4.58)           | 21 (3.96)              | 0.749   |
| - Not having           | 110 (95.65)                              | 524 (95.97)                                   |         | 125 (95.42)        | 509 (96.04)            |         |
| Fever                  |                                          |                                               |         |                    |                        |         |
| - Having               | 4 (3.48)                                 | 32 (5.86)                                     | 0.306   | 5 (3.82)           | 31 (5.85)              | 0.359   |
| - Not having           | 111 (96.52)                              | 514 (94.14)                                   |         | 126 (96.18)        | 499 (94.15)            |         |
| RBCs in stool          |                                          |                                               |         |                    |                        |         |
| - Having               | 0 (0)                                    | 0 (0)                                         | -       | 0 (0)              | 0 (0)                  | -       |
| - Not having           | 115 (100)                                | 546 (100)                                     |         | 131 (100)          | 530 (100)              |         |
| WBCs in stool          |                                          |                                               |         |                    |                        |         |
| - Having               | 3 (2.61)                                 | 6 (1.10)                                      | 0.204   | 3 (2.29)           | 6 (1.13)               | 0.306   |
| - Not having           | 112 (97.39)                              | 540 (98.90)                                   |         | 128 (97.71)        | 524 (98.87)            |         |

**Figure S1.** Growth phase of *G. lamblia* WB-C6 strain. Data are expressed as mean  $\pm$  SD of three independent experiments. Correlation factor ( $r^2$ ) was calculated using linear regression by GraphPad Prism 7.01.

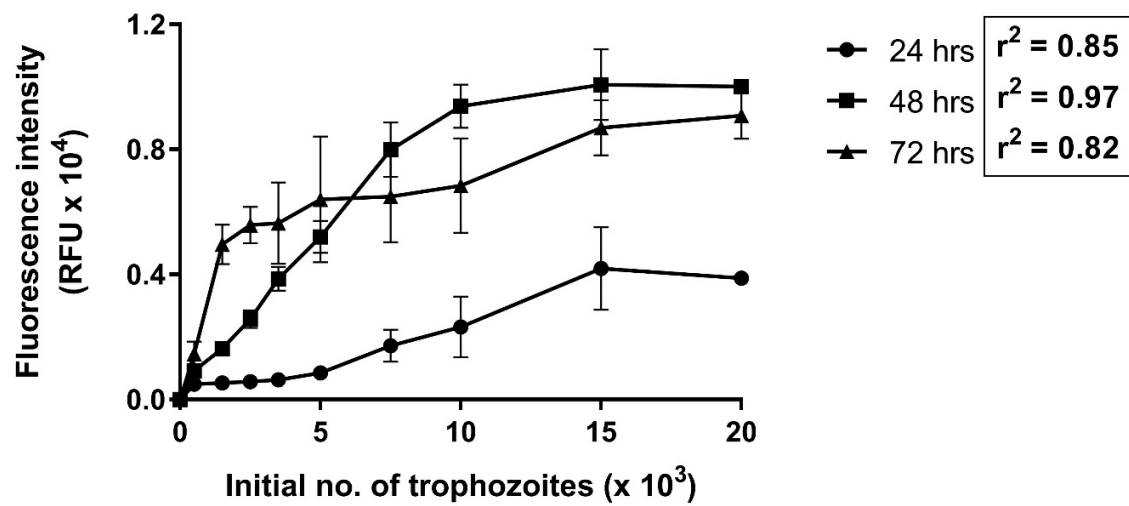

**Figure S2.** Photomicrographs of excystation and axenization of *G. lamblia* isolate in TYI-S-33 medium. (A) purified cysts before excystation; (B) mobile trophozoites after excystation; (C) trophozoites in monolayer. All images are at 200X magnification.

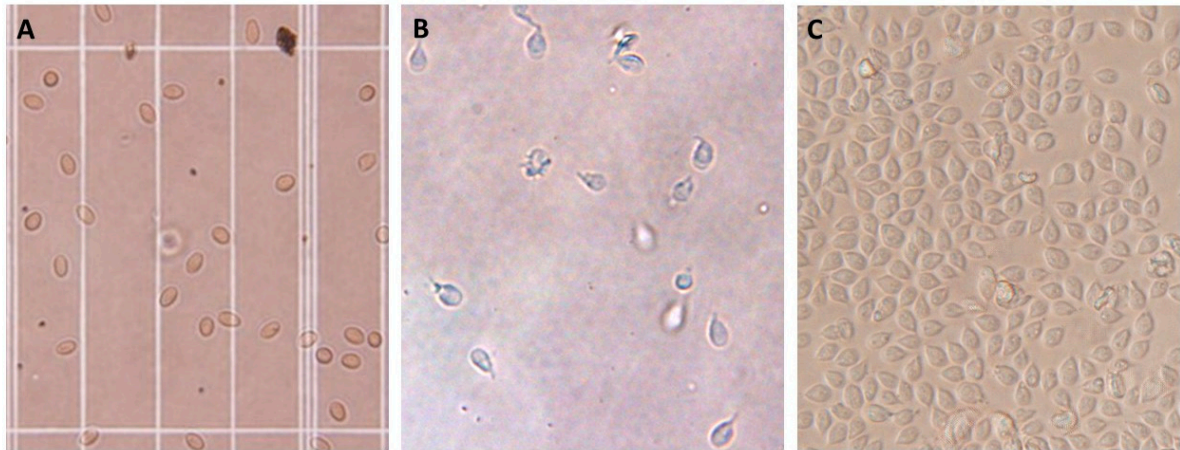

Supplement: s1 [file s1]
